# Supplementary material for: Evaluation and Analysis of Absence of Homozygosity (AOH) Using Chromosome Analysis by Medium Coverage Whole Genome Sequencing (CMA-seq) in Prenatal Diagnosis
Source: MDPI journal article supplement (doi:10.3390/diagnostics13030560), 2023-02-02
Supplement: s1 [file s1]

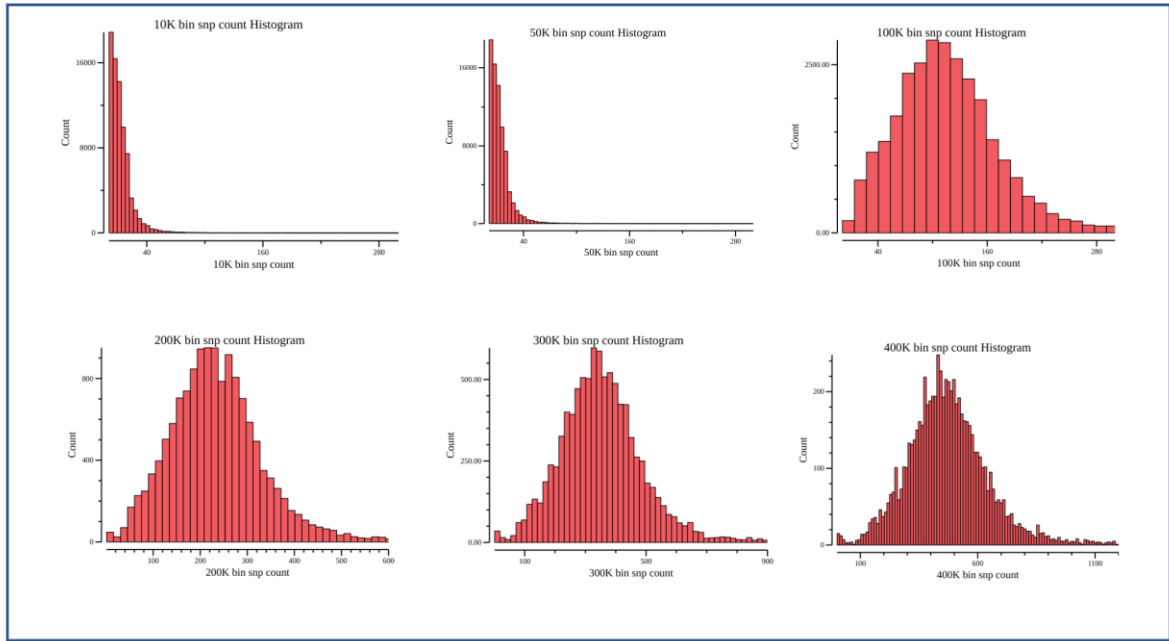

Supplemental Figure S1: The number of variants dependence on the bin size selection for 24 normal samples.
